# Supplementary material for: A new type of phosphate-based phosphor Na3CsMg7(PO4)6:Eu2+/Mn2+with high quantum efficiency and high thermostability
Source: Royal Society of Chemistry journal article supplement (doi:10.1039/d1dt04393e), 2022-01-01
Supplement: d1dt04393e1.pdf [file d1dt04393e1.pdf]

## Electronic Supplementary Information

Table S1. Rietveld refined crystallographic parameters of  $\text{Na}_3\text{CsMg}_7(\text{PO}_4)_6:x\text{Eu}^{2+}$  ( $x = 0, 0.06, 0.10, 0.14, 0.18, 0.20$  and  $0.25$ ) samples.

| Samples               | $x = 0$            | $x = 0.06$         | $x = 0.10$         | $x = 0.14$         | $x = 0.18$         | $x = 0.20$         | $x = 0.25$         |
|-----------------------|--------------------|--------------------|--------------------|--------------------|--------------------|--------------------|--------------------|
| Crystal system        | Monoclinic         |                    |                    |                    |                    |                    |                    |
| Space group           | $C12/c1$ (15)      |                    |                    |                    |                    |                    |                    |
| $a$ (Å)               | 12.762506<br>(187) | 12.762642<br>(144) | 12.763464<br>(181) | 12.763513<br>(143) | 12.763892<br>(172) | 12.765026<br>(160) | 12.765918<br>(148) |
| $b$ (Å)               | 10.720152<br>(105) | 10.721246<br>(107) | 10.722427<br>(110) | 10.723418<br>(140) | 10.723445<br>(135) | 10.724007<br>(119) | 10.725558<br>(145) |
| $c$ (Å)               | 15.545872<br>(194) | 15.546492<br>(191) | 15.547940<br>(200) | 15.549800<br>(236) | 15.550003<br>(216) | 15.551211<br>(246) | 15.556384<br>(249) |
| $\alpha = \gamma$ (°) | 90                 | 90                 | 90                 | 90                 | 90                 | 90                 | 90                 |
| $\beta$ (°)           | 113                | 113                | 113                | 113                | 113                | 113                | 113                |
| $V$ (Å <sup>3</sup> ) | 1957.613           | 1958.598           | 1958.757           | 1958.804           | 1958.840           | 1959.178           | 1959.789           |
| $2\theta$ -interval   | 6-75°              | 6-75°              | 6-75°              | 6-75°              | 6-75°              | 6-75°              | 6-75°              |
| $Z$                   | 16                 | 16                 | 16                 | 16                 | 16                 | 16                 | 16                 |
| $R_{\text{wp}}$ (%)   | 6.71 %             | 6.02 %             | 6.42 %             | 6.57 %             | 6.38 %             | 6.19 %             | 6.88 %             |
| $R_{\text{p}}$ (%)    | 4.45 %             | 4.06 %             | 4.23 %             | 4.17 %             | 4.11 %             | 4.06 %             | 4.15 %             |
| $\chi^2$              | 1.309              | 1.059              | 1.205              | 1.264              | 1.181              | 1.118              | 1.406              |

Table S2. Rietveld refined crystallographic parameters of  $\text{Na}_3\text{CsMg}_{7-y}(\text{PO}_4)_6: y\text{Mn}^{2+}$  ( $y = 0, 0.2, 0.4, 0.6, 0.8, 1.0$ ) and  $\text{Na}_3\text{CsMg}_{6.6}(\text{PO}_4)_6: 0.18\text{Eu}^{2+}/0.4\text{Mn}^{2+}$  series samples.

| Samples               | $y = 0$            | $y = 0.2$          | $y = 0.4$          | $y = 0.6$          | $y = 0.8$          | $y = 1.0$          | $x = 0.18,$<br>$y = 0.4$ |
|-----------------------|--------------------|--------------------|--------------------|--------------------|--------------------|--------------------|--------------------------|
| Crystal system        | Monoclinic         |                    |                    |                    |                    |                    |                          |
| Space group           | $C12/c1$ (15)      |                    |                    |                    |                    |                    |                          |
| $a$ (Å)               | 12.762506<br>(187) | 12.770974<br>(147) | 12.774812<br>(149) | 12.784986<br>(142) | 12.790604<br>(157) | 12.804872<br>(138) | 12.773269<br>(161)       |
| $b$ (Å)               | 10.720152<br>(105) | 10.725223<br>(113) | 10.725857<br>(109) | 10.733162<br>(102) | 10.734987<br>(113) | 10.739982<br>(99)  | 10.729808<br>(117)       |
| $c$ (Å)               | 15.545872<br>(194) | 15.556590<br>(203) | 15.558581<br>(207) | 15.576183<br>(193) | 15.584209<br>(212) | 15.602550<br>(183) | 15.568131<br>(131)       |
| $\alpha = \gamma$ (°) | 90                 | 90                 | 90                 | 90                 | 90                 | 90                 | 90                       |
| $\beta$ (°)           | 113                | 113                | 113                | 113                | 113                | 113                | 113                      |
| $V$ (Å <sup>3</sup> ) | 1957.613           | 1961.356           | 1962.185           | 1967.493           | 1969.792           | 1975.278           | 1963.588                 |
| $2\theta$ -interval   | 6-75°              | 6-75°              | 6-75°              | 6-75°              | 6-75°              | 6-75°              | 6-75°                    |
| $Z$                   | 16                 | 16                 | 16                 | 16                 | 16                 | 16                 | 16                       |
| $R_{\text{wp}}$ (%)   | 6.71 %             | 6.49 %             | 7.07 %             | 6.66 %             | 6.17 %             | 5.12 %             | 5.46 %                   |
| $R_{\text{p}}$ (%)    | 4.45 %             | 4.40 %             | 4.86 %             | 4.60 %             | 4.16 %             | 3.41 %             | 3.79 %                   |
| $\chi^2$              | 1.309              | 1.225              | 1.501              | 1.329              | 1.185              | 0.825              | 0.8206                   |

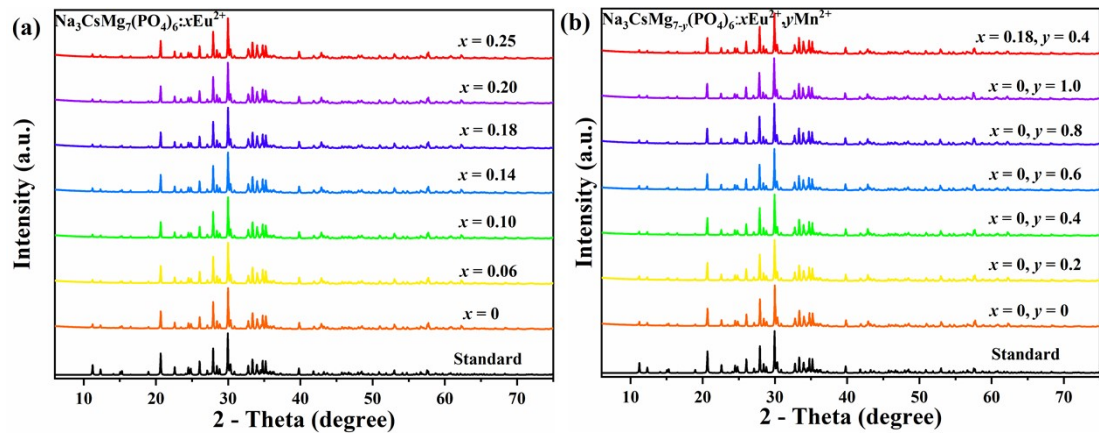

Figure S1. (a) XRD patterns of the  $\text{Na}_3\text{CsMg}_7(\text{PO}_4)_6:\text{xEu}^{2+}$  ( $x = 0, 0.06, 0.10, 0.14, 0.18, 0.20$  and  $0.25$ ); (b) XRD patterns of the the  $\text{Na}_3\text{CsMg}_{7-y}(\text{PO}_4)_6:y\text{Mn}^{2+}$  ( $y = 0, 0.2, 0.4, 0.6, 0.8, 1.0$ ) and  $\text{Na}_3\text{CsMg}_{6.6}(\text{PO}_4)_6: 0.18\text{Eu}^{2+}, 0.4\text{Mn}^{2+}$  series samples.

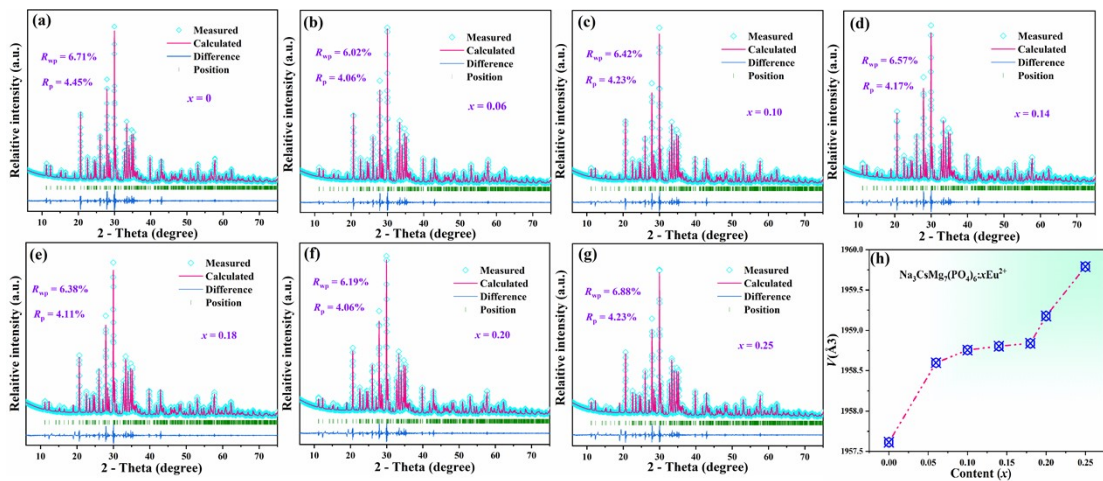

Figure S2. (a), (b) (c) (d) (e) (f) and (g) Rietveld refinements of the XRD files for  $\text{Na}_3\text{CsMg}_7(\text{PO}_4)_6:\text{xEu}^{2+}$  ( $x = 0, 0.06, 0.10, 0.14, 0.18, 0.20$  and  $0.25$ ), respectively; (h) The unit cell volume  $V$  for  $\text{Na}_3\text{CsMg}_7(\text{PO}_4)_6:\text{xEu}^{2+}$  ( $x = 0, 0.06, 0.10, 0.14, 0.18, 0.20$  and  $0.25$ ) samples.

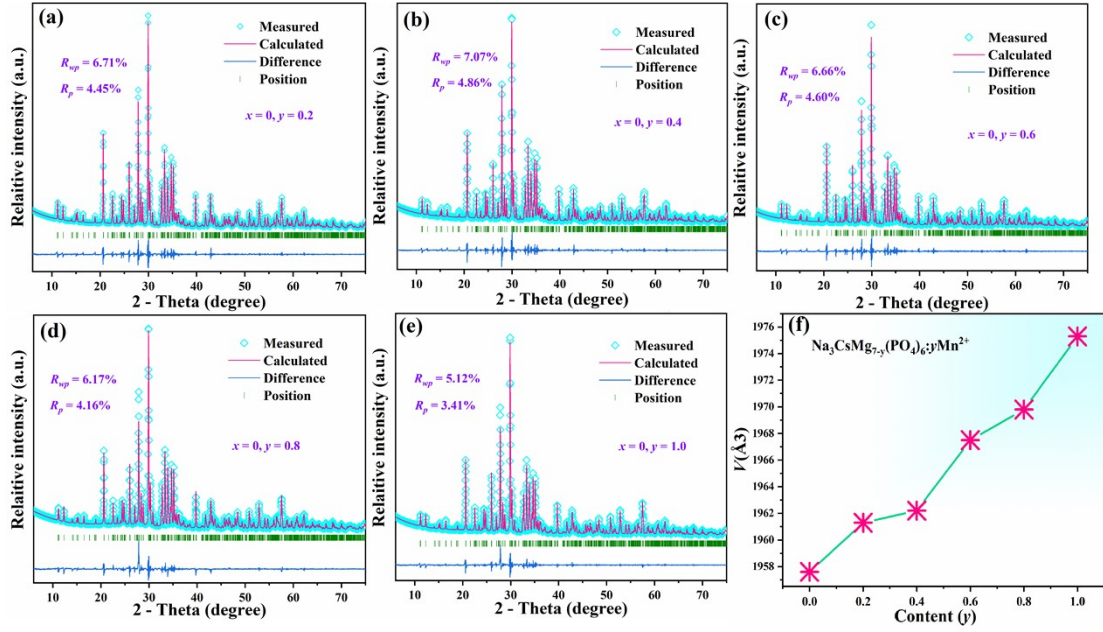

Figure S3. (a), (b) (c) (d) and (e) Rietveld refinements of the XRD files for  $\text{Na}_3\text{CsMg}_{7-y}(\text{PO}_4)_6:y\text{Mn}^{2+}$  ( $y = 0, 0.2, 0.4, 0.6, 0.8, 1.0$ ), respectively; (f) The unit cell volume  $V$  for  $\text{Na}_3\text{CsMg}_{7-y}(\text{PO}_4)_6:y\text{Mn}^{2+}$  ( $y = 0, 0.2, 0.4, 0.6, 0.8, 1.0$ ) samples.

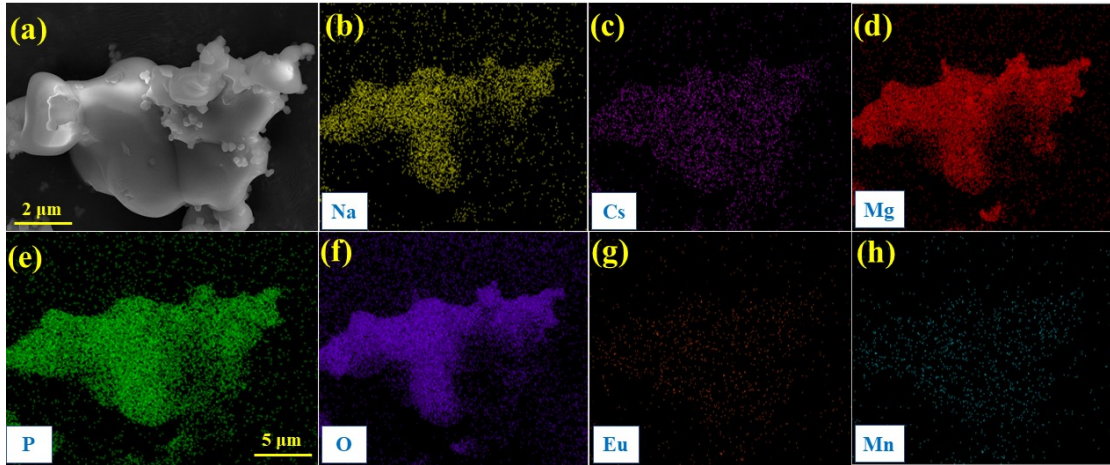

Figure S4. SEM images of  $\text{Na}_3\text{CsMg}_7(\text{PO}_4)_6:0.18\text{Eu}^{2+},0.4\text{Mn}^{2+}$  at different magnifications (a) and elemental mappings of (b) Na, (c) Cs, (d) Mg, (e) P, (f) O, (g) Eu and (h) Mn.

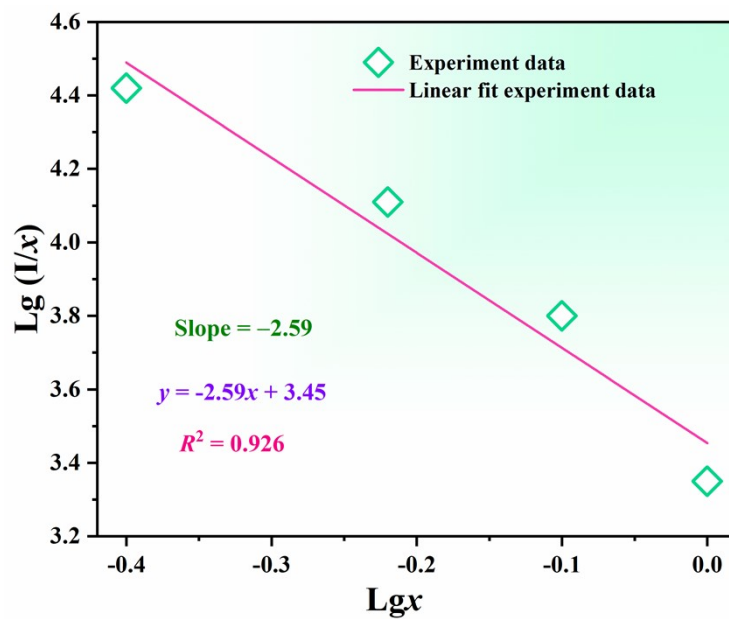

Figure S5. Fitting line of  $\log(I/x)$  versus  $\log(x)$  in  $\text{Na}_3\text{CsMg}_{7-y}(\text{PO}_4)_6: y\text{Mn}^{2+}$  ( $y = 0, 0.2, 0.4, 0.6, 0.8, 1.0$ ) phosphors.
